# Supplementary material for: The Embryonic mir-35 Family of microRNAs Promotes Multiple Aspects of Fecundity in Caenorhabditis elegans
Source: PubMed Central journal article supplement (PMC4169167; doi:10.1534/g3.114.011973), 2014-07-21
Supplement: supp_g3.114.011973_011973SI.pdf [file supp_g3.114.011973_011973SI.pdf]

**The embryonic *mir-35-42* family of microRNAs promotes multiple aspects of hermaphrodite fecundity in *C. elegans***

Katherine McJunkin\* and Victor Ambros\*

\*Program in Molecular Medicine, RNA Therapeutics Institute, University of Massachusetts Medical School, Worcester, MA 01606, USA

Corresponding authors:

Katherine McJunkin and Victor Ambros

373 Plantation Street

Biotech II Suite 306

Worcester, MA 01606

katherine.mcjunkin@umassmed.edu

victor.ambros@umassmed.edu

**DOI: 10.1534/g3.114.011973**

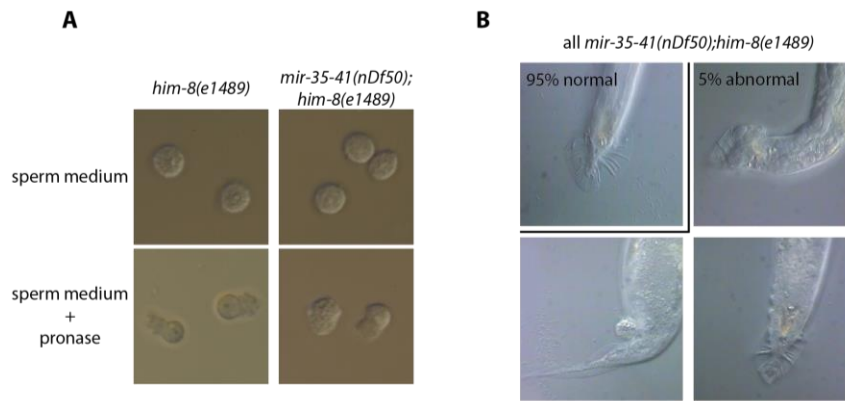

**Figure S1** *mir-35-41(nDf50);him-8(e1489)* males produce normal sperm, but abnormal male tail structures. (A) Sperm dissected from *him-8(e1489)* or *mir-35-41(nDf50);him-8(e1489)* males. Sperm of either genotype were activated to form pseudopods by *in vitro* treatment with pronase (bottom). (B) Representative tail structures of *mir-35-41(nDf50);him-8(e1489)* males. The majority of animals are wild type (upper left), while approximately five percent display grossly abnormal tails incompatible with mating.

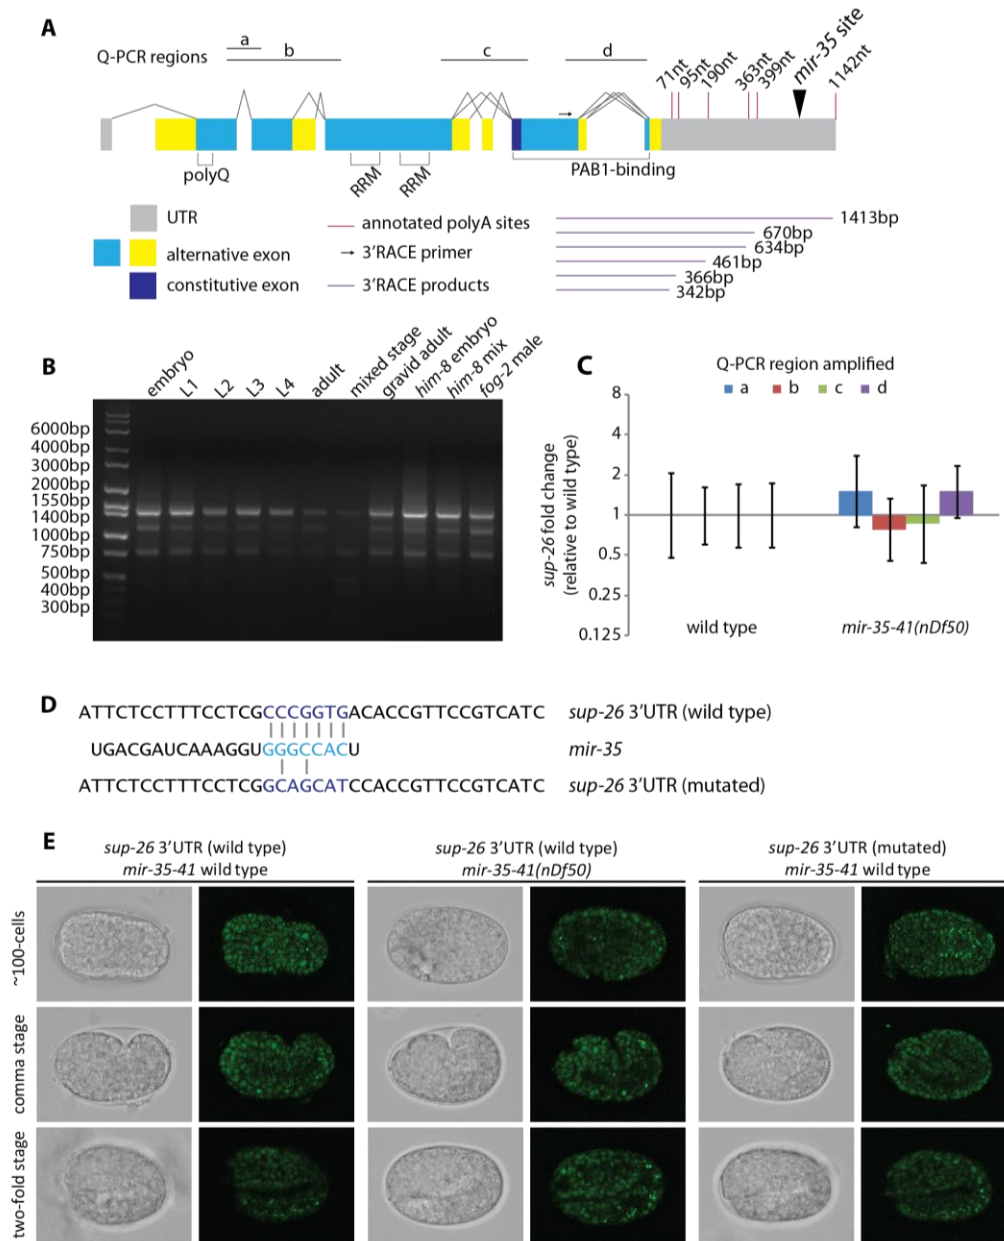

**Figure S2 Endogenous *sup-26* mRNA contains a *mir-35* family target site, but *sup-26* Q-PCR and transcriptional reporters do not show *mir-35-41*-dependent regulation in embryos.** (A) Schematic of annotated *sup-26* 3'UTRs and predicted 3'RACE products. (B) *sup-26* 3' RACE products. The prominent 1413bp product corresponds to the 1142nt 3'UTR containing the putative *mir-35* target site. (C) Q-PCR of *sup-26* mRNA in wild type or *mir-35-41(nDf50)* embryos maintained at 25°. Location of Q-PCR primers are indicated on gene model in (A). (D) *mir-35* family target site in wild type or mutated *sup-26* 3'UTR. (E) DIC and GFP fluorescence micrographs of transgenic embryos at indicated stages containing *sup-26<sup>promoter</sup>::GFP-H2B::sup-26<sup>3'UTR</sup>* transcriptional fusion reporters. The 3'UTR corresponds to either the wild type *sup-26* 3'UTR or a mutated version as indicated in (D). Animals are either wild type or *mir-35-41(nDf50)* as indicated. Animals were maintained at 25°.
